# Supplementary material for: Deciphering the Microbiota and Volatile Profiles of Algerian Smen, a Traditional Fermented Butter
Source: MDPI journal article supplement (doi:10.3390/microorganisms10040736), 2022-03-29
Supplement: s1 [file s1]

## Supplementary Tables

**Table S1.** Alpha-diversity indices of bacterial communities from *Smen* samples collected in different households

| SampleID | Seqs/Sample | chao1<br>Ave. | equitability<br>Ave. | goods_coverage<br>Ave. | observed_species<br>Ave. | shannon<br>Ave. | simpson<br>Ave. |
|----------|-------------|---------------|----------------------|------------------------|--------------------------|-----------------|-----------------|
| B4       | 17290       | 83.937        | 0.284                | 0.999                  | 73.9                     | 1.762           | 0.523           |
| B5       | 17290       | 69.962        | 0.46                 | 0.999                  | 61.3                     | 2.733           | 0.723           |
| K1       | 17290       | 54.224        | 0.472                | 0.999                  | 47.2                     | 2.622           | 0.745           |
| K2       | 17290       | 51.264        | 0.315                | 1                      | 48.5                     | 1.765           | 0.468           |
| O1       | 17290       | 46.8          | 0.151                | 1                      | 43.9                     | 0.825           | 0.182           |
| S1       | 17290       | 113.149       | 0.68                 | 1                      | 106.5                    | 4.579           | 0.905           |
| S2       | 17290       | 88.349        | 0.548                | 0.999                  | 76.1                     | 3.427           | 0.824           |
| S3       | 17290       | 102.822       | 0.511                | 0.999                  | 94.9                     | 3.354           | 0.803           |
| S5       | 17290       | 98.031        | 0.434                | 0.999                  | 86.6                     | 2.795           | 0.723           |

**Table S2.** Alpha-diversity indices of fungal communities from *Smen* samples collected in different households

| SampleID | Seqs/Sample | chao1<br>Ave. | equitability<br>Ave. | goods_coverage<br>Ave. | observed_species<br>Ave. | shannon<br>Ave. | simpson<br>Ave. |
|----------|-------------|---------------|----------------------|------------------------|--------------------------|-----------------|-----------------|
| B3       | 45130       | 21            | 0.23                 | 1                      | 20.7                     | 1.006           | 0.319           |
| B4       | 45130       | 30.176        | 0.102                | 1                      | 28.4                     | 0.492           | 0.161           |
| B5       | 45130       | 28.3          | 0.375                | 1                      | 26.9                     | 1.782           | 0.587           |
| E10      | 45130       | 23.401        | 0.008                | 1                      | 20.1                     | 0.036           | 0.005           |
| K1       | 45130       | 44.883        | 0.355                | 1                      | 41.9                     | 1.914           | 0.633           |
| K2       | 45130       | 31.575        | 0.347                | 1                      | 29.3                     | 1.693           | 0.529           |
| S1       | 45130       | 54.068        | 0.554                | 1                      | 51.6                     | 3.151           | 0.833           |
| S2       | 45130       | 37.903        | 0.283                | 1                      | 34.2                     | 1.443           | 0.499           |
| S3       | 45130       | 41.825        | 0.515                | 1                      | 41.4                     | 2.768           | 0.749           |
| S5       | 45130       | 56.333        | 0.466                | 1                      | 53                       | 2.671           | 0.766           |

**Table S3.** Volatile compounds identified in different *Smen* samples using HS-GC-MS

| Family    | Compounds       | Odor character             | Formula                          | MW (g/mol) | Ion (m/z) | RI calcule (AT) | RI Literature |
|-----------|-----------------|----------------------------|----------------------------------|------------|-----------|-----------------|---------------|
| Alcohols  | Ethanol         | sweet                      | C <sub>4</sub> H <sub>8</sub> O  | 72.11      | 46        | 937             | 925-955       |
|           | 2-Pentanol*     | balsamic                   | C <sub>5</sub> H <sub>12</sub> O | 88.15      | 45        | 1133            | 1081-1153     |
|           | 3-Methylbutanol | fermented, fruity, pungent | C <sub>5</sub> H <sub>12</sub> O | 88.148     | 70        | 1225            | 1180-1230     |
|           | Pentanol        | fruit                      | C <sub>5</sub> H <sub>12</sub> O | 88.15      |           | 1270            | 1241-1271     |
|           | 2-Heptanol      | herb                       | C <sub>7</sub> H <sub>16</sub> O | 116.2      | 83        | 1335            | 1280-1344     |
|           | Phenylmethanol  | floral, rosy, phenolic     | C <sub>7</sub> H <sub>8</sub> O  | 108.14     | 60        | 1898            | 1821-1909     |
|           | Phenylethanol   |                            | C <sub>8</sub> H <sub>10</sub> O | 122.16     | 79        | 1942            | 1859-1947     |
| Aldehydes | Butanal         | pungent, green             | C <sub>4</sub> H <sub>8</sub> O  | 72.11      | 72        | 859             | 855-911       |
|           | Methylbutanal   | malt                       | C <sub>5</sub> H <sub>10</sub> O | 86.13      | 58        | 905             | 884-924       |
|           | Hexanal         | grass, tallow, fat         | C <sub>6</sub> H <sub>12</sub> O | 100.16     | 56        | 1077            | 1062-1111     |
|           | 2-Pentenal      | almond, malt, pungent      | C <sub>5</sub> H <sub>8</sub> O  | 84.12      | 84        | 1130            | 1043-1145     |
|           | Heptanal        | fat, citrus, rancid        | C <sub>7</sub> H <sub>14</sub> O | 114.19     | 96        | 1182            | 1160-1196     |
|           | 4-heptenal      | biscuit, cream             | C <sub>7</sub> H <sub>12</sub> O | 112.17     | 68        | 1238            | 1216-1267     |
|           | Octanal         | fat, soap, lemon, green    | C <sub>8</sub> H <sub>16</sub> O | 128.21     | 84        | 1283            | 1273-1306     |
|           | 2-Heptenal      | fat, citrus, rancid        | C <sub>7</sub> H <sub>12</sub> O | 112.17     | 83        | 1314            | 1287-1340     |
|           | Nonanal         | fat, citrus, green         | C <sub>9</sub> H <sub>18</sub> O | 142.24     | 96        | 1389            | 1375-1409     |
|           | 2-Octenal       | green, nut, fat            | C <sub>8</sub> H <sub>14</sub> O | 126,2      | 70        | 1432            | 1392-1466     |

|        |                                 |                      |                                               |        |     |      |           |
|--------|---------------------------------|----------------------|-----------------------------------------------|--------|-----|------|-----------|
|        | Heptadienal                     | nut, fat             | C <sub>7</sub> H <sub>10</sub> O              | 110.15 | 81  | 1514 | 1451-1522 |
|        | Benzaldehyde                    | almond, burnt sugar  | C <sub>7</sub> H <sub>6</sub> O               | 106.12 | 105 | 1536 | 1488-1529 |
|        | 2-Nonenal                       | orris, fat, cucumber | C <sub>9</sub> H <sub>16</sub> O              | 140.22 | 83  | 1548 | 1497-1582 |
| Esters | Ethyl_Acetate                   | pineapple            | C <sub>4</sub> H <sub>8</sub> O <sub>2</sub>  | 60.05  | 70  | 869  | 856-917   |
|        | Ethyl propanoate                | fruit, win           | C <sub>5</sub> H <sub>10</sub> O <sub>2</sub> | 130.18 | 102 | 944  | 910-977   |
|        | Methyl_butanoate                | fruity, winey        | C <sub>5</sub> H <sub>10</sub> O <sub>2</sub> | 88.105 | 102 | 989  | 943-1008  |
|        | Ethylbutanoate                  | ether, fruit, sweet  | C <sub>6</sub> H <sub>12</sub> O <sub>2</sub> | 116.16 | 88  | 1030 | 1010-1071 |
|        | Isopropyl_butanoate             | sweet, fruity        | C <sub>7</sub> H <sub>14</sub> O <sub>2</sub> | 130.18 | 71  | 1035 |           |
|        | Ethyl-2-methylbutanoate*        | pungent, fruit       | C <sub>7</sub> H <sub>14</sub> O <sub>2</sub> | 130.18 | 102 | 1045 | 1015-1073 |
|        | Ethyl-3-methylbutanoate         | sweet, fruity        | C <sub>7</sub> H <sub>14</sub> O <sub>2</sub> | 130.18 | 85  | 1063 | 1041-1114 |
|        | Methylbutyl_acetate             | sweet, fruity        | C <sub>7</sub> H <sub>14</sub> O <sub>2</sub> | 130.18 | 70  | 1130 | 1112-1143 |
|        | Ethyl-2-Butenoate*              | fruity               | C <sub>6</sub> H <sub>10</sub> O <sub>2</sub> | 114.14 | 99  | 1165 |           |
|        | Pentan-2-yl butanoate           |                      | C <sub>9</sub> H <sub>18</sub> O <sub>2</sub> | 158.24 | 71  | 1211 | 1214-1260 |
|        | Butyl butanoate                 |                      | C <sub>8</sub> H <sub>16</sub> O <sub>2</sub> | 144.21 | 101 | 1214 | 1183-1243 |
|        | Ethyl hexanoate                 |                      | C <sub>8</sub> H <sub>16</sub> O <sub>2</sub> | 144.21 | 88  | 1232 | 1222-1258 |
|        | Methylethyl hexanoate           | apple peel, fruit    | C <sub>9</sub> H <sub>18</sub> O <sub>2</sub> | 158.24 | 158 | 1232 | 1223-1236 |
|        | Methylbutyl 2-methylpropanoate* |                      | C <sub>9</sub> H <sub>18</sub> O <sub>2</sub> | 158.24 | 70  | 1263 | 1183-1234 |
|        | Heptyl acetate                  | flower               | C <sub>9</sub> H <sub>18</sub> O <sub>2</sub> | 158.24 | 98  | 1372 | 1360-1401 |

|             |                        |                      |                                                |        |     |      |           |
|-------------|------------------------|----------------------|------------------------------------------------|--------|-----|------|-----------|
|             | Heptan-2-yl butanoate* | fruity, winey        | C <sub>11</sub> H <sub>22</sub> O <sub>2</sub> | 186.29 | 115 | 1398 | 1388-1401 |
|             | Isopropyl octanoate    |                      | C <sub>11</sub> H <sub>22</sub> O <sub>2</sub> | 186.29 | 84  | 1446 | 1419-1471 |
|             | Ethyl octanoate        |                      | C <sub>10</sub> H <sub>20</sub> O <sub>2</sub> | 172.26 | 88  | 1446 | 1428-1466 |
|             | Ethyl decanoate        | fruity, winey        | C <sub>12</sub> H <sub>24</sub> O <sub>2</sub> | 200.32 | 101 | 1636 | 1595-1678 |
|             | Phenylethyl acetate    |                      | C <sub>10</sub> H <sub>12</sub> O <sub>2</sub> | 164.2  | 104 | 1812 | 1775-1862 |
| Fatty acids | Hexanoic acid          | fruity, fatty sour   | C <sub>6</sub> H <sub>12</sub> O <sub>2</sub>  | 116.16 | 60  | 1846 | 1810-1860 |
|             | Butanoic acid          | acidic, buttery      | C <sub>4</sub> H <sub>8</sub> O <sub>2</sub>   | 88.11  | 60  | 1623 | 1596-1653 |
|             | Acetic acid            | sour                 | C <sub>2</sub> H <sub>4</sub> O <sub>2</sub>   | 60.05  | 60  | 1475 | 1403-1479 |
|             | Formic acid            | pungent              | CH <sub>2</sub> O <sub>2</sub>                 | 46.025 | 46  | 1534 | 1470-1533 |
|             | Heptanoic acid         | rancidity            | C <sub>7</sub> H <sub>14</sub> O <sub>2</sub>  | 130.18 | 87  | 1951 | 1915-1997 |
|             | Octanoic acid          | oily, rancid, capric | C <sub>8</sub> H <sub>16</sub> O <sub>2</sub>  | 144.21 | 60  | 2059 | 2024-2067 |
|             | Nonanoic acid          | fatty                | C <sub>9</sub> H <sub>18</sub> O <sub>2</sub>  | 158.24 | 129 | 2169 | 2128-2202 |
|             | Propanoic acid         | pungent, rancid, soy | C <sub>4</sub> H <sub>8</sub> O <sub>2</sub>   | 74.08  | 74  | 1555 | 1486-1560 |
|             | Pentanoic acid         | sweat                | C <sub>5</sub> H <sub>10</sub> O <sub>2</sub>  | 60     | 60  | 1739 | 1685-1770 |
|             | Decanoic acid          | rancid, fat          | C <sub>10</sub> H <sub>20</sub> O <sub>2</sub> | 60     | 60  | 2275 | 2231-2316 |
|             | Methylpropanoic acid   | /                    | C <sub>4</sub> H <sub>8</sub> O <sub>2</sub>   | 73     | 73  | 1577 | 1547-1588 |
|             | 3-methylbutanoic acid  | green, phenolic      | C <sub>5</sub> H <sub>10</sub> O <sub>2</sub>  | 60     | 60  | 1670 | 1647-1686 |
|             | Ethylfuran             | –                    | C <sub>6</sub> H <sub>8</sub> O                | 96.13  | 81  | 939  | 1219-1249 |

|         |                                    |                      |                                               |        |     |      |           |
|---------|------------------------------------|----------------------|-----------------------------------------------|--------|-----|------|-----------|
| Furans  | Pentylfuran                        | green bean, butter   | C <sub>9</sub> H <sub>14</sub> O              | 138.21 | 81  | 1228 | 1282      |
|         | Trans-2-(2-Pentenyl) furan         | –                    | C <sub>9</sub> H <sub>12</sub> O              | 136.19 | 107 | 1296 | 1005-1067 |
| Ketones | Methylpentanone                    | mint                 | C <sub>8</sub> H <sub>16</sub> O              | 128.21 | 100 | 1011 | 1005-1067 |
|         | Tetrahydro-6-methyl-2H-Pyran-2-one |                      | C <sub>6</sub> H <sub>10</sub> O <sub>2</sub> | 114.14 | 70  | 1786 | 1751-1830 |
|         | 3,5-Octadien-2-one                 | geranium, metal      | C <sub>8</sub> H <sub>12</sub> O              | 124.18 | 124 | 1573 | 1524-1610 |
|         | Undecanone                         | orange, fresh, green | C <sub>11</sub> H <sub>22</sub> O             | 170.29 | 58  | 1595 | 1570-1628 |
|         | 3,4-dimethyl-2,5-furandione        |                      | C <sub>6</sub> H <sub>6</sub> O <sub>3</sub>  | 126.11 | 126 | 1729 | 1680-1764 |
|         | Acetone                            |                      | C <sub>4</sub> H <sub>8</sub> O <sub>2</sub>  | 88.11  | 58  | 810  | 809-842   |
|         | Butanone                           |                      | C <sub>4</sub> H <sub>8</sub> O               | 88.11  | 72  | 887  | 893-943   |
|         | Diacetyl                           | butter               | C <sub>4</sub> H <sub>6</sub> O <sub>2</sub>  | 86.09  | 86  | 976  | 951-999   |
|         | Pentanone                          | ether, fruit         | C <sub>5</sub> H <sub>10</sub> O              | 86.13  | 71  | 985  | 845-980   |
|         | Hexanone                           | ether, grape         | C <sub>6</sub> H <sub>12</sub> O              | 100.16 | 100 | 1075 | 1069-1116 |
|         | Heptanone                          | soap                 | C <sub>7</sub> H <sub>14</sub> O              | 114.19 | 114 | 1180 | 1178-1190 |
|         | 5-Hepten-2-one                     | metal                | C <sub>7</sub> H <sub>12</sub> O              | 112.17 | 112 | 1218 | 1249      |
|         | Methylheptan-3-one*                |                      | C <sub>8</sub> H <sub>16</sub> O              | 128.21 |     | 1262 |           |
|         | Acetoin                            | butter, cream        | C <sub>4</sub> H <sub>8</sub> O <sub>2</sub>  | 88.11  | 88  | 1278 | 1265-1287 |
|         | Octanone                           | herb, butter, resin  | C <sub>8</sub> H <sub>16</sub> O              | 128.21 | 128 | 1279 | 1265-1309 |
|         | Hydroxypropanone                   |                      | C <sub>3</sub> H <sub>6</sub> O <sub>2</sub>  | 74.08  | 74  | 1295 | 1266-1326 |
|         | 1-Hydroxy-2-butanone               |                      | C <sub>4</sub> H <sub>8</sub> O <sub>2</sub>  | 88.11  | 57  | 1373 | 1351-1399 |

|          |                               |                                   |                                                |        |     |      |           |
|----------|-------------------------------|-----------------------------------|------------------------------------------------|--------|-----|------|-----------|
|          | Nonanone                      | hot milk, soap, green             | C <sub>9</sub> H <sub>18</sub> O               | 142.24 | 58  | 1384 | 1374-1403 |
|          | 8-Nonen-2-one                 | baked                             | C <sub>9</sub> H <sub>16</sub> O               | 140.22 | 111 | 1457 | 1473-1494 |
|          | 5-Ethylidihydro-2(3H)-uranone |                                   | C <sub>8</sub> H <sub>12</sub> O <sub>2</sub>  | 140.18 | 85  | 1695 | 1661-1745 |
| Terpenes | α-Pinene                      | pine, turpentine                  | C <sub>10</sub> H <sub>16</sub>                | 136.23 | 136 | 1010 | 1000-1077 |
|          | Limonene                      | lemon, orange mint,<br>turpentine | C <sub>10</sub> H <sub>16</sub>                | 136.23 | 136 | 1186 |           |
|          | β-Phellandrene                |                                   | C <sub>10</sub> H <sub>16</sub>                | 94.14  | 79  | 1900 | 1190-1220 |
|          | Dimethyl disulfide            | onion, cabbage, putrid            | C <sub>2</sub> H <sub>6</sub> S <sub>2</sub>   | 94.2   | 94  | 1062 | 1036-1094 |
| Others   | Dimethyl sulfone              | sulfur, burnt                     | C <sub>2</sub> H <sub>6</sub> O <sub>2</sub> S | 136.23 | 93  | 1196 | 1895-1912 |
| Styrene  | Styrene                       | balsamic, gasoline                | C <sub>8</sub> H <sub>8</sub>                  | 104.15 | 93  | 1248 | 1299-1293 |

\*Tentatively identified

**Table S4.** Alpha-diversity indices of bacterial communities from *Smen* samples throughout the different preparation stages of *Smen*.

| Description                   | Seqs/Sample | chao1 Ave. | equitability Ave. | goods_coverage Ave. | observed_species Ave. | shannon Ave. | simpson Ave. |
|-------------------------------|-------------|------------|-------------------|---------------------|-----------------------|--------------|--------------|
| Milk                          | 22480       | 75.067     | 0.634             | 1                   | 74.7                  | 3.945        | 0.879        |
| <i>Raib</i>                   | 22480       | 61.648     | 0.116             | 1                   | 53.5                  | 0.665        | 0.137        |
| Churn surface                 | 22480       | 75.933     | 0.408             | 1                   | 65.3                  | 2.459        | 0.629        |
| Milk churn                    | 22480       | 75.5       | 0.548             | 1                   | 74                    | 3.405        | 0.807        |
| Butter                        | 22480       | 79.598     | 0.177             | 1                   | 71.8                  | 1.092        | 0.24         |
| Salt                          | 22480       | 57.144     | 0.322             | 1                   | 52.7                  | 1.84         | 0.578        |
| <i>Smen</i> container surface | 22480       | 69.091     | 0.243             | 1                   | 62.3                  | 1.447        | 0.345        |
| <i>Smen</i> 1 month           | 22480       | 61.433     | 0.146             | 1                   | 55.7                  | 0.849        | 0.2          |
| <i>Smen</i> 2 months          | 22480       | 53.705     | 0.133             | 1                   | 50.3                  | 0.752        | 0.175        |
| <i>Smen</i> 3 months          | 22480       | 64.558     | 0.139             | 1                   | 56.8                  | 0.811        | 0.181        |
| <i>Smen</i> 6 months          | 22480       | 70.41      | 0.164             | 1                   | 59.9                  | 0.97         | 0.221        |

**Table S5.** Alpha-diversity indices of fungal communities from *Smen* samples throughout the different preparation stages of *Smen*.

| Description                   | Seqs/Sample | chao1 Ave. | equitability Ave. | goods_coverage Ave. | observed_species Ave. | shannon Ave. | simpson Ave. |
|-------------------------------|-------------|------------|-------------------|---------------------|-----------------------|--------------|--------------|
| Milk                          | 39440       | 60.973     | 0.344             | 1                   | 57                    | 2.005        | 0.622        |
| <i>Raib</i>                   | 39440       | 49.75      | 0.34              | 1                   | 49                    | 1.911        | 0.644        |
| Churn surface                 | 39440       | 54.133     | 0.434             | 1                   | 50                    | 2.446        | 0.709        |
| Milk churn                    | 39440       | 49.261     | 0.391             | 1                   | 47                    | 2.169        | 0.686        |
| Butter                        | 39440       | 53.657     | 0.416             | 1                   | 50.8                  | 2.36         | 0.681        |
| Salt                          | 39440       | 53.9       | 0.528             | 1                   | 53.9                  | 3.039        | 0.755        |
| <i>Smen</i> container surface | 39440       | 90.05      | 0.398             | 1                   | 51                    | 2.257        | 0.669        |
| <i>Smen</i> 1 month           | 39440       | 57.412     | 0.427             | 1                   | 55.7                  | 2.478        | 0.701        |
| <i>Smen</i> 2 months          | 39440       | 60.7       | 0.506             | 1                   | 56.7                  | 2.95         | 0.819        |
| <i>Smen</i> 3 months          | 39440       | 54.453     | 0.367             | 1                   | 52.3                  | 2.097        | 0.646        |
| <i>Smen</i> 6 months          | 39440       | 64.858     | 0.491             | 1                   | 60.4                  | 2.905        | 0.793        |

**Table S6.** Accession numbers of metabarcoding sequences (16S)

| Sample         | Type of sample   | ID library | Accession number |
|----------------|------------------|------------|------------------|
| B4             | Fermented butter | lib372829  | SAMN23005575     |
| B5             | Fermented butter | lib372830  | SAMN23102035     |
| K1             | Fermented butter | lib372831  | SAMN23102456     |
| K2             | Fermented butter | lib372832  | SAMN23102457     |
| S3             | Fermented butter | lib372833  | SAMN23102498     |
| S2             | Fermented butter | lib372834  | SAMN23102499     |
| S1             | Fermented butter | lib372835  | SAMN23131947     |
| O1             | Fermented butter | lib372828  | SAMN22962632     |
| S5             | Fermented butter | lib372836  | SAMN22962633     |
| Milk           | Milk             | lib372837  | SAMN22962648     |
| Raib           | Raib             | lib372838  | SAMN22962661     |
| Bio churn      | Bio churn        | lib372839  | SAMN22962662     |
| Butter         | Butter           | lib372841  | SAMN22962670     |
| Salt           | Salt             | lib372842  | SAMN22963470     |
| Bio receipient | Bio receipient   | lib372839  | SAMN22968376     |
| D1             | Fermented butter | lib372844  | SAMN22968413     |
| D3             | Fermented butter | lib372846  | SAMN22968438     |
| D6             | Fermented butter | lib372847  | SAMN23005371     |
| Milk churn     | Milk             | lib372840  | SAMN23133887     |
| D2             | Fermented butter | lib372845  | SAMN22968425     |

**Table S7.** Accession numbers of metabarcoding sequences (ITS)

| Sample        | Type of sample   | ID library | Accession number |
|---------------|------------------|------------|------------------|
| B4            | Fermented butter | lib373096  | SAMN22602011     |
| B5            | Fermented butter | lib373097  | SAMN22645107     |
| K1            | Fermented butter | lib373098  | SAMN22645411     |
| K2            | Fermented butter | lib373099  | SAMN22645454     |
| B3            | Fermented butter | lib373115  | SAMN22739177     |
| S3            | Fermented butter | lib373100  | SAMN22739247     |
| E10           | Fermented butter | lib373116  | SAMN22741321     |
| S2            | Fermented butter | lib373101  | SAMN22744425     |
| S1            | Fermented butter | lib373102  | SAMN22746555     |
| S5            | Fermented butter | lib373103  | SAMN22785408     |
| Milk          | Milk             | lib373104  | SAMN22837352     |
| Raib          | Raib             | lib373105  | SAMN22837353     |
| Bio churn     | Bio churn        | lib373106  | SAMN22837354     |
| Butter        | Butter           | lib373108  | SAMN22837355     |
| Salt          | Salt             | lib373109  | SAMN22837356     |
| Bio recipient | Bio receipient   | lib373110  | SAMN22837357     |
| D1            | Fermented butter | lib373111  | SAMN22837358     |
| Milk churn    | Milk churn       | lib373107  | SAMN22895715     |

## Supplementary Figures.

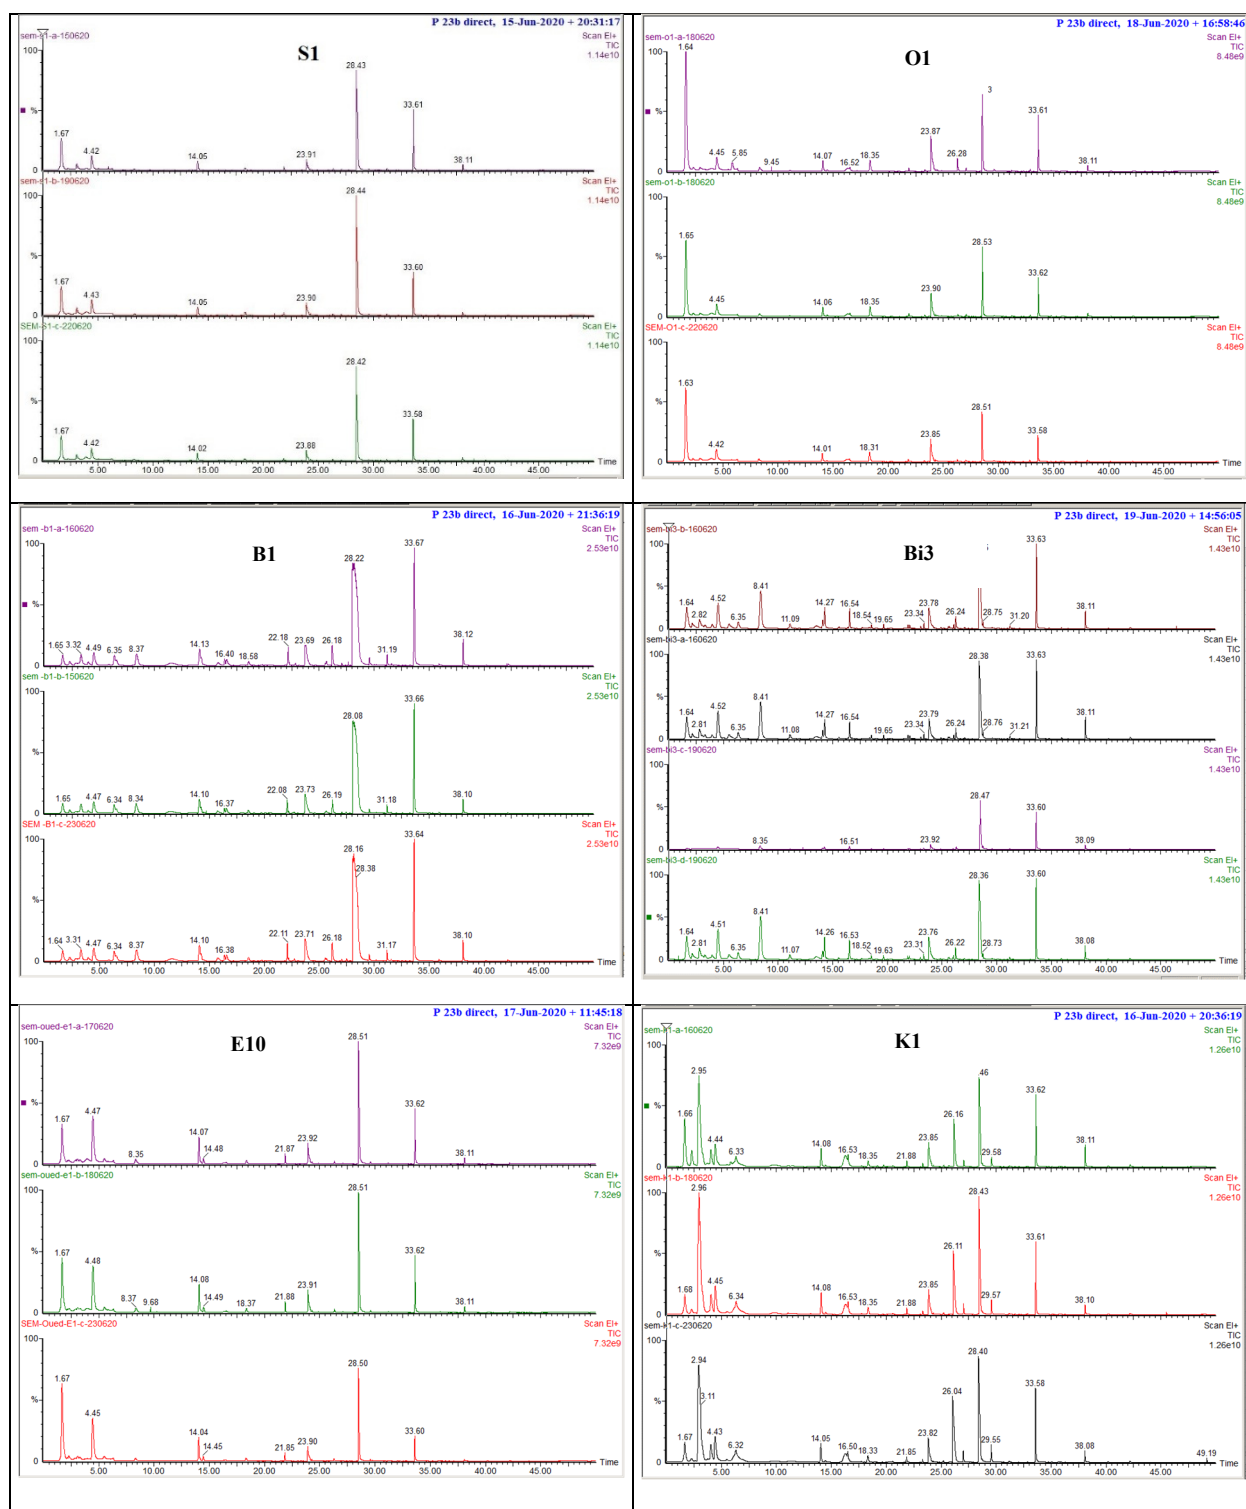

**Figure S1.** Examples of chromatograms obtained using headspace (HS) gas chromatography-mass spectrometry (GC-MS) of *Smen* samples collected in different households.

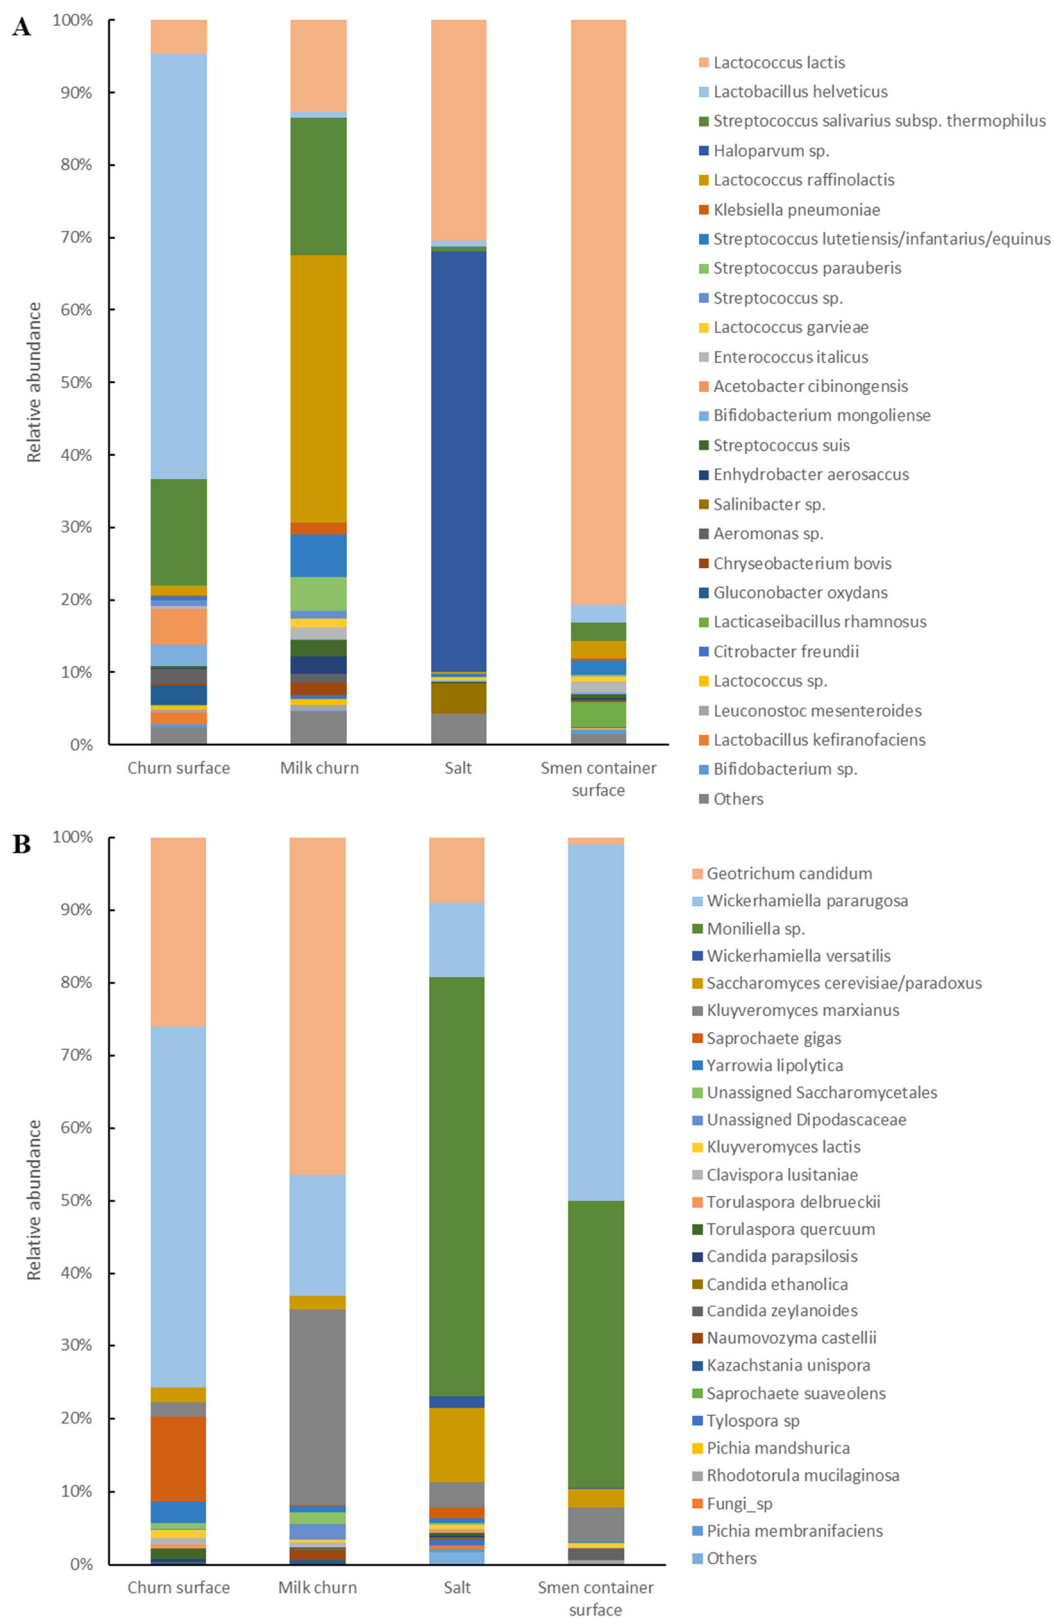

**Figure S2.** Bacterial (A) and fungal (B) diversity in potent microbial reservoirs encountered during *Smen* manufacturing revealed using a metagenetic approach.

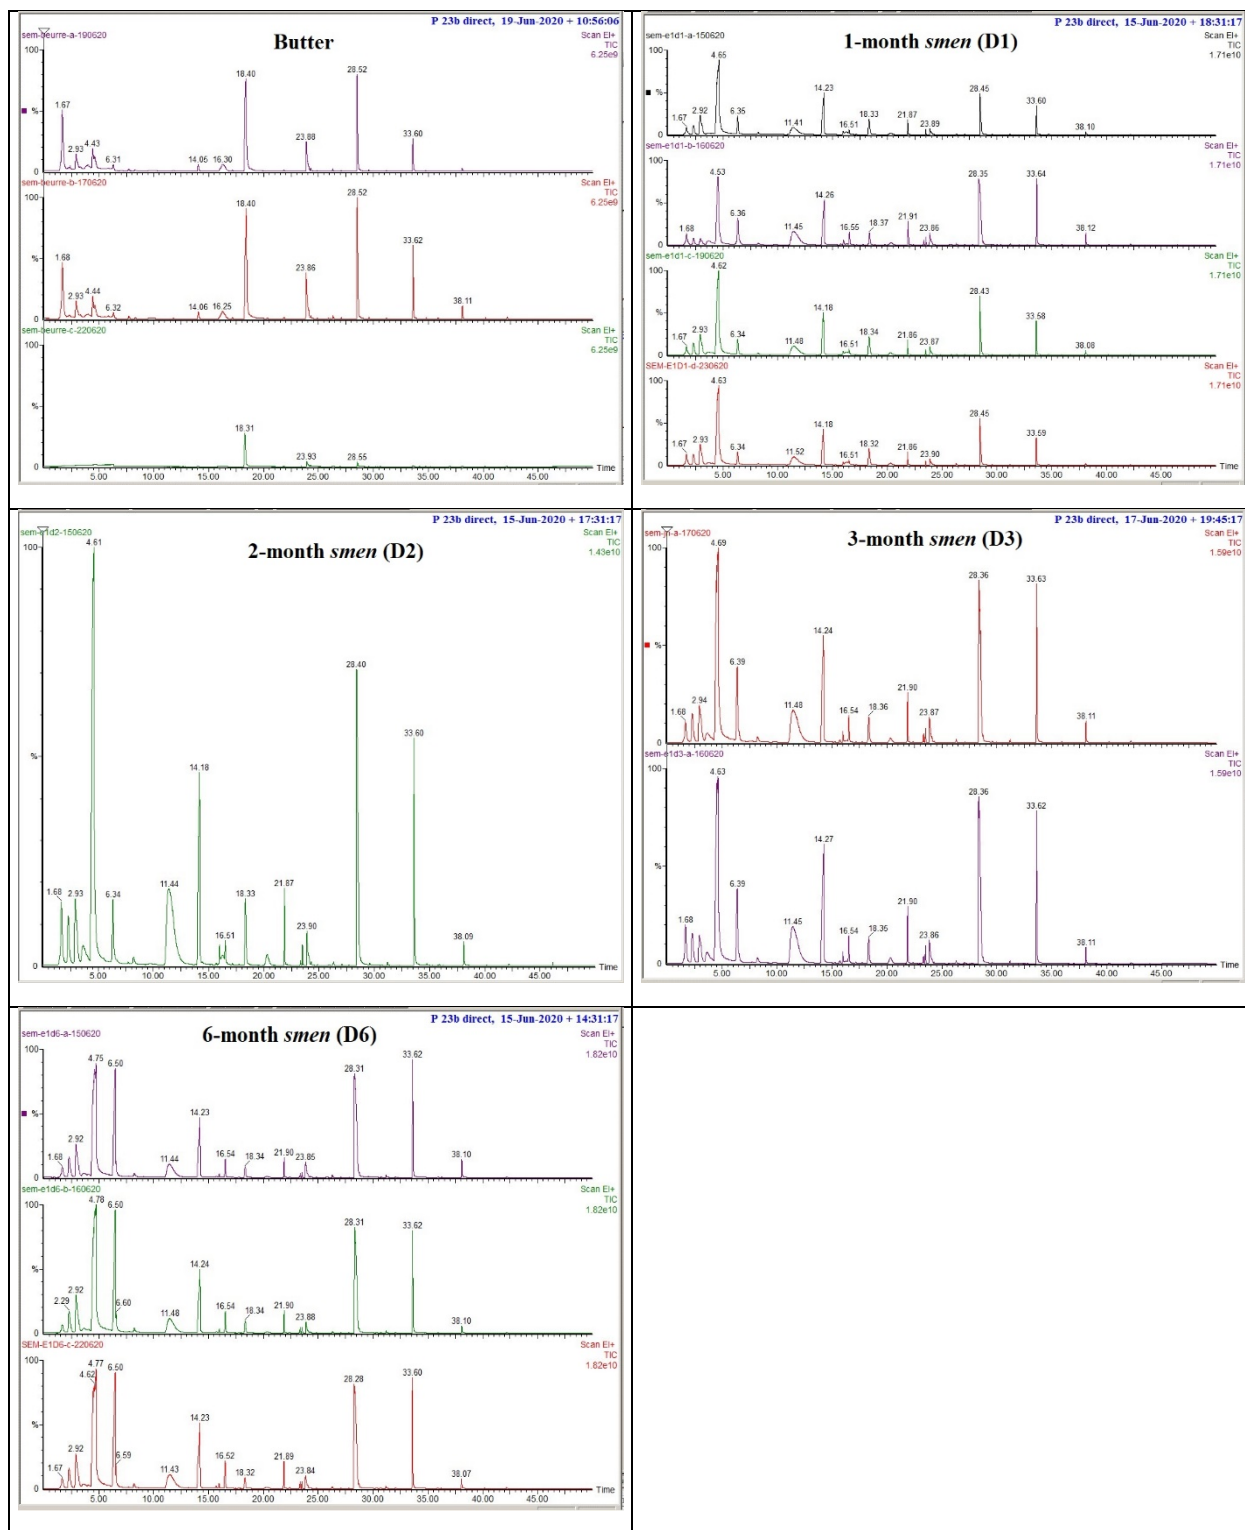

**Figure S3.** Examples of chromatograms obtained using headspace (HS) gas chromatography-mass spectrometry (GC-MS) of *Smen* during maturation.
